# Supplementary material for: Preparation of graphene oxide and polymer-like quantum dots and their one- and two-photon induced fluorescence properties
Source: Royal Society of Chemistry journal article supplement (doi:10.1039/c5cp06582h), 2016-01-01
Supplement: c5cp06582h1.pdf [file c5cp06582h1.pdf]

## Electronic Supplementary Information

For

# Preparation of graphene oxide and polymer-like quantum dots and their one- and two-photon induced fluorescence properties

Jia Jia Huang,<sup>ab</sup> Min Zhi Rong<sup>\*b</sup> and Ming Qiu Zhang<sup>\*b</sup>

<sup>a</sup>School of Chemical Engineering and Energy, School of Materials Science and Engineering, Zhengzhou University, Zhengzhou 450001, P. R. China

<sup>b</sup>Key Laboratory for Polymeric Composite and Functional Materials of Ministry of Education, GD HPPC Lab, School of Chemistry and Chemical Engineering, Sun Yat-sen University, Guangzhou 510275, China

E-mail: cesrmz@mail.sysu.edu.cn; cesrmz@mail.sysu.edu.cn

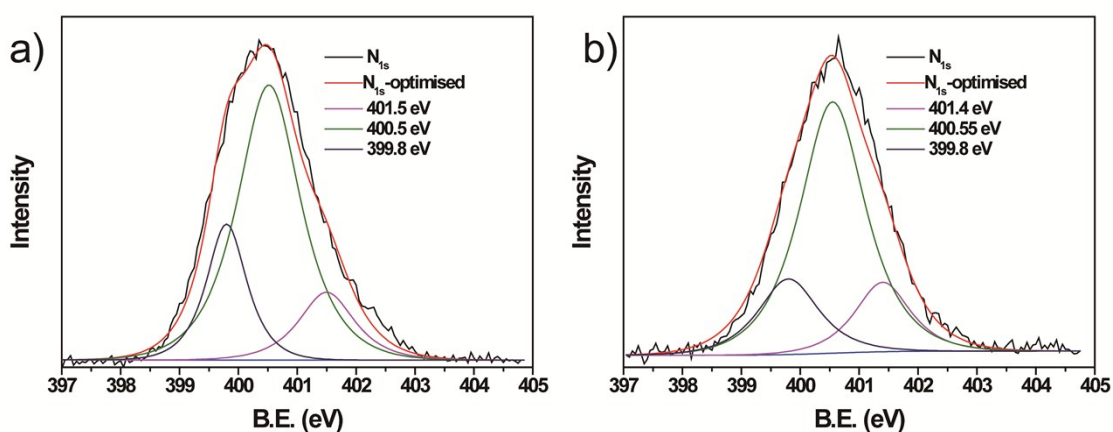

Fig.S1 XPS spectra of N1s of PQDs (a) and GOQDs (b)

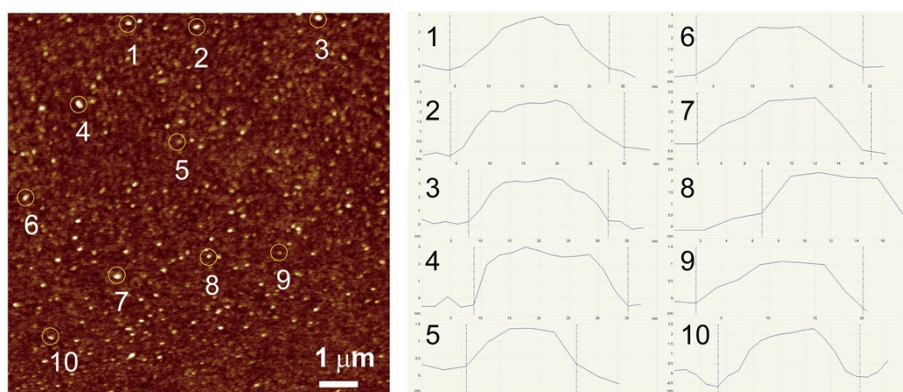

Fig. S2 Height profiles of ten random GOQDs.

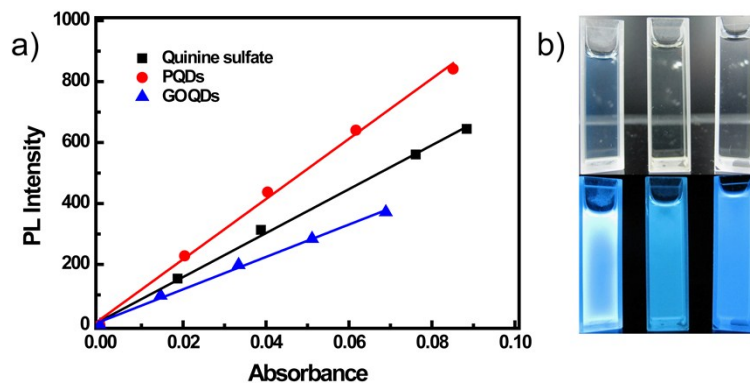

**Fig. S3** (a) Integrated PL intensity versus absorbance plot of PQDs, GOQDs and quinine sulphate. (b) Photographs of PQDs, GOQDs and quinine sulfate (from left to right, 10 µg/ml) under daylight (up) and 365 nm UV (down).

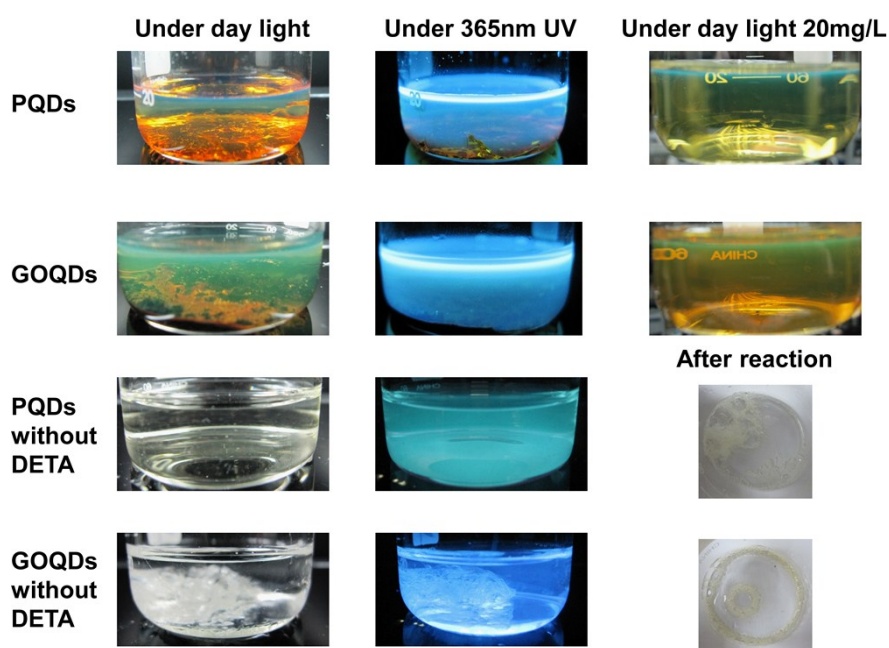

**Fig. S4** Photographs of PQDs and GOQDs with and without DETA under daylight and 365 nm UV.

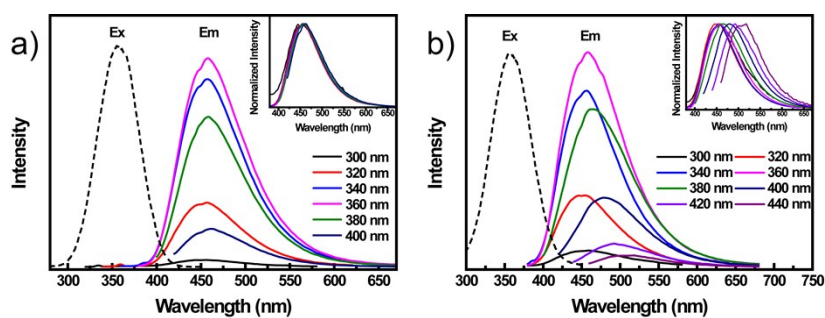

**Fig. S5** Excitation and emission spectra of (a) PQDs and (b) GOQDs aqueous solution

(10  $\mu\text{g/ml}$ ) at different excitation wavelengths. Inset: normalized emission spectra.

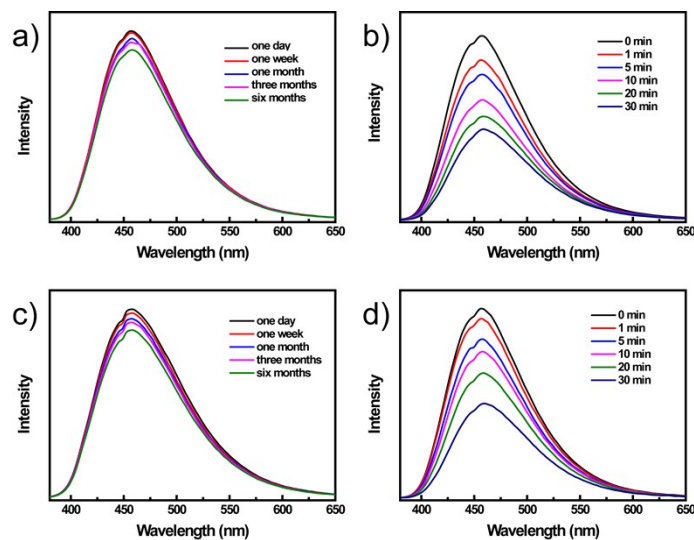

**Fig. S6** PL spectra of (a, b) PQDs and (c, d) GOQDs in aqueous solution (a, c) after different storage times and (b, d) after exposure to 500 W UV light for different times. PQDs and GOQDs: 10  $\mu\text{g/ml}$ ; excitation wavelength: 360 nm.

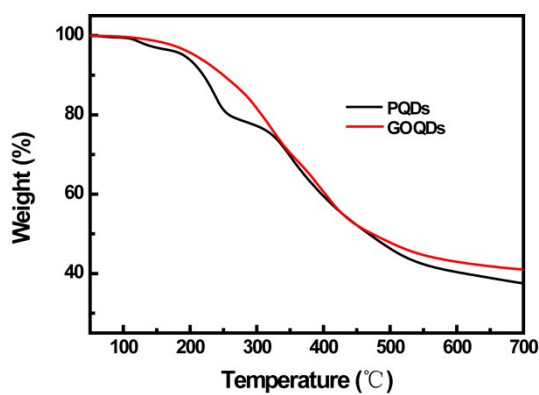

**Fig. S7** TGA curves of PQDs and GOQDs.

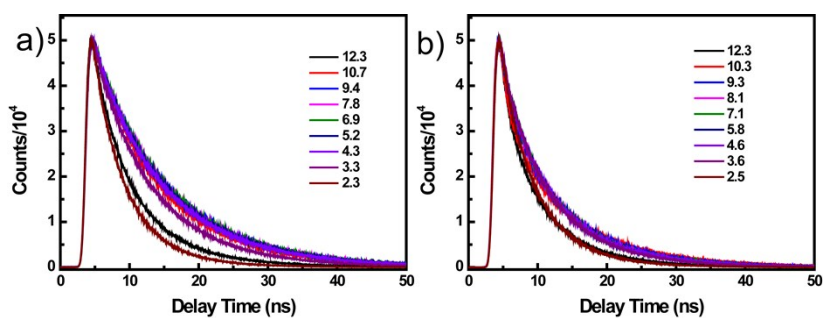

**Fig. S8** Fluorescence life time decay profiles of (a) PQDs and (b) GOQDs aqueous

solution (10  $\mu\text{g/ml}$ ) at different pH values with excitation at 405 nm. The emission was monitored at 460 nm.

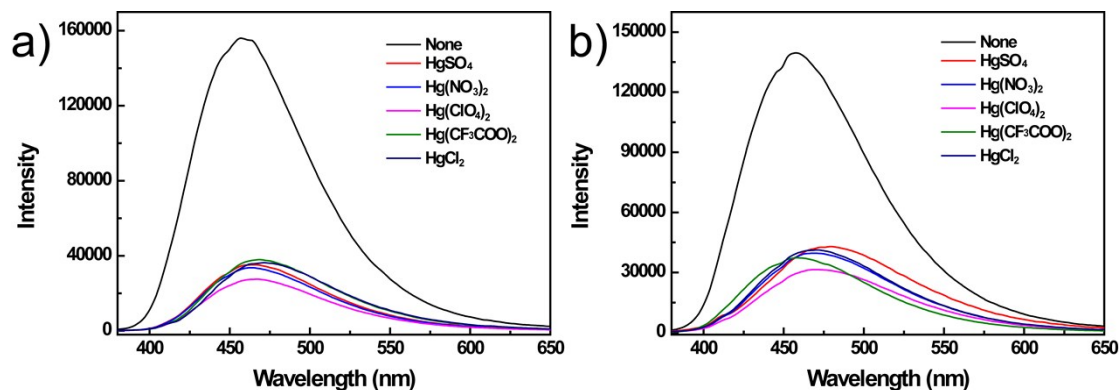

**Fig. S9** Effect of different mercury salts (0.05 mM) on the PL intensity of (a) PQDs and (b) GOQDs (1  $\mu\text{g/ml}$ ) with the excitation wavelength at 360 nm.

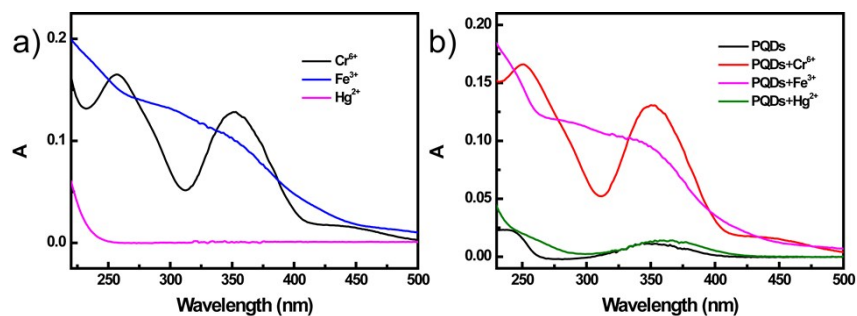

**Fig. S10** (a) UV-vis absorption spectra of  $\text{Cr}^{6+}$ ,  $\text{Fe}^{3+}$  and  $\text{Hg}^{2+}$ . (b) UV-vis absorption spectra of PQDs and their mixture with  $\text{Cr}^{6+}$ ,  $\text{Fe}^{3+}$  and  $\text{Hg}^{2+}$ . PQDs: 1  $\mu\text{g/ml}$ ;  $\text{Cr}^{6+}$ ,  $\text{Fe}^{3+}$  and  $\text{Hg}^{2+}$ : 0.05 mM.

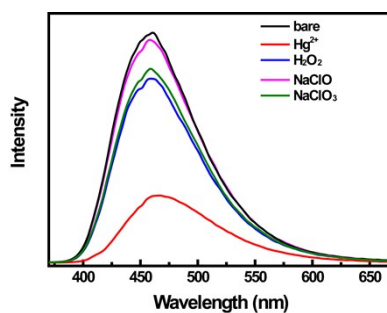

**Fig. S11** Effect of oxidant (0.05 mM) and  $\text{Hg}^{2+}$  (0.05 mM) on the PL intensity of GOQDs (1  $\mu\text{g/ml}$ ) with the excitation wavelength at 360 nm.

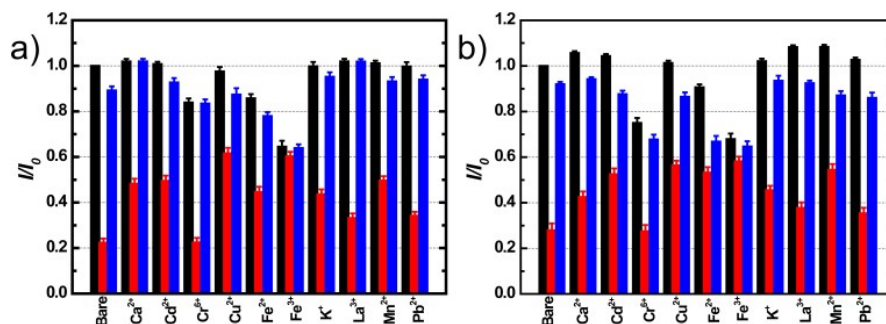

Fig. S12 Relative PL intensity ( $I/I_0$ ) of (a) PQDs and (b) GOQDs aqueous solution (1  $\mu\text{g/ml}$ ) containing various metal ions (50  $\mu\text{M}$ ) without (black) and with  $\text{Hg}^{2+}$  (red), after the addition of 100  $\mu\text{M}$  EDTA (blue).

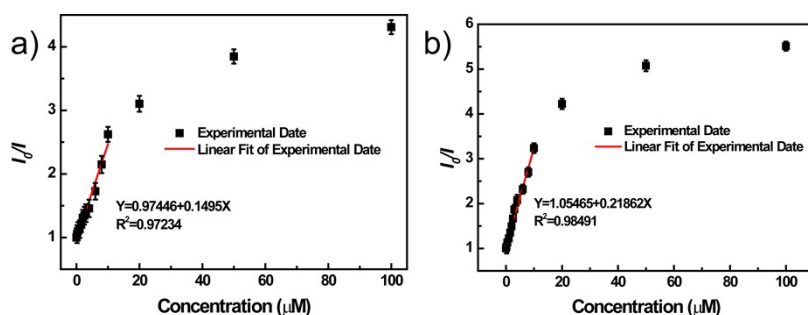

**Fig. S13** Plots of PL intensity ratio of (a) PQDs and (b) GOQDs aqueous solution (1  $\mu\text{g/ml}$ ) at 460 nm versus  $\text{Hg}^{2+}$  concentration (excited at 360 nm).  $I_0$  and  $I$  correspond to the PL intensities of PQDs or GOQDs at 460 nm in the absence and presence of  $\text{Hg}^{2+}$ , respectively.

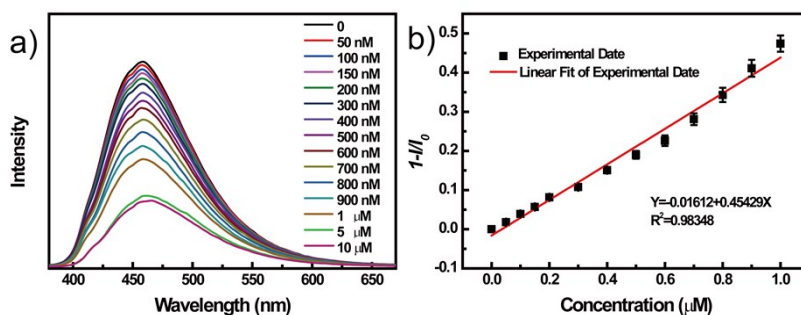

**Fig. S14** (a) PL spectra of PQDs aqueous solution (0.1  $\mu\text{g/ml}$ ) with different  $\text{Hg}^{2+}$  concentrations (excited at 360 nm). (b) Plot of PL intensity ratio of PQDs aqueous solution (0.1  $\mu\text{g/ml}$ ) at 460 nm versus  $\text{Hg}^{2+}$  concentrations in the range from 0 to 1.0  $\mu\text{M}$ .

**Table S1** Elemental analysis of CA, PQDs and GOQDs

| Sample | C (wt%) | H (wt%) | N (wt %) | O (wt%, calculated) | C/N  | C/O  |
|--------|---------|---------|----------|---------------------|------|------|
| CA     | 37.5    | 4.17    | 0        | 58.33               |      | 0.86 |
| PQDs   | 46.70   | 5.52    | 12.77    | 35.01               | 4.27 | 1.78 |
| GOQDs  | 52.70   | 6.16    | 11.76    | 29.38               | 5.23 | 2.39 |

**Table S2** XPS analysis of PQDs and GOQDs

| Sample | C (%) | O (%) | N (%) | C=C/C-C (%) | Oxidized carbon (%) | Nitrous carbon (%) |
|--------|-------|-------|-------|-------------|---------------------|--------------------|
| PQDs   | 57.8  | 27.4  | 14.8  | 27.8        | 44.8                | 27.4               |
| GOQDs  | 63.1  | 23.7  | 13.2  | 31.6        | 40.7                | 27.7               |

**Table S3** Time-resolved fluorescence-delay analysis of PQDs at different pH values

| pH   | $\tau_1$ (ns) | Rel (%) | $\tau_2$ (ns) | Rel (%) | $\tau$ (ns) | $\chi^2$ |
|------|---------------|---------|---------------|---------|-------------|----------|
| 2.3  | 3.3           | 40      | 6.2           | 60      | 5.5         | 1.2      |
| 3.3  | 4.6           | 15      | 9.4           | 85      | 9.0         | 1.4      |
| 4.3  | 3.7           | 5       | 10.6          | 95      | 10.5        | 1.5      |
| 5.2  | 3.6           | 5       | 10.9          | 95      | 10.8        | 1.6      |
| 6.9  | 2.9           | 2       | 10.9          | 98      | 10.8        | 1.7      |
| 7.8  | 3.2           | 3       | 10.9          | 97      | 10.8        | 1.7      |
| 9.4  | 3.4           | 3       | 10.9          | 97      | 10.8        | 1.6      |
| 10.7 | 3.4           | 5       | 10.2          | 95      | 10.1        | 1.6      |
| 12.3 | 4.0           | 45      | 8.7           | 55      | 7.4         | 1.6      |

**Table S4** Time-resolved fluorescence-delay analysis of GOQDs at different pH values

| pH   | $\tau_1$ (ns) | Rel (%) | $\tau_2$ (ns) | Rel (%) | $\tau$ (ns) | $\chi^2$ |
|------|---------------|---------|---------------|---------|-------------|----------|
| 2.5  | 3.0           | 28      | 6.3           | 72      | 5.8         | 1.3      |
| 3.5  | 3.0           | 17      | 8.2           | 83      | 7.9         | 1.5      |
| 4.6  | 2.9           | 18      | 9.0           | 82      | 8.5         | 1.2      |
| 5.8  | 3.2           | 20      | 8.8           | 80      | 8.4         | 1.2      |
| 7.1  | 3.0           | 19      | 9.0           | 81      | 8.6         | 1.3      |
| 8.1  | 3.0           | 19      | 9.0           | 81      | 8.5         | 1.2      |
| 9.3  | 2.8           | 20      | 8.5           | 80      | 8.1         | 1.7      |
| 10.3 | 2.6           | 20      | 8.2           | 80      | 7.7         | 1.2      |
| 12.3 | 2.0           | 22      | 7.2           | 78      | 6.8         | 1.1      |

**Table S5** Formation constants for metal complexes with EDTA

| Metal ions       | lg k | Metal ions       | lg k |
|------------------|------|------------------|------|
| Na <sup>+</sup>  | 1.7  | Cd <sup>2+</sup> | 16.5 |
| Ca <sup>2+</sup> | 10.7 | Pb <sup>2+</sup> | 18.0 |
| Mn <sup>2+</sup> | 13.9 | Cu <sup>2+</sup> | 18.8 |
| Fe <sup>2+</sup> | 14.3 | Hg <sup>2+</sup> | 21.8 |
| La <sup>3+</sup> | 15.4 | Fe <sup>3+</sup> | 25.1 |

**Table S6** Time-resolved fluorescence-delay analysis of PQDs with different [Hg<sup>2+</sup>]

| [Hg <sup>2+</sup> ]/ $\mu$ M | $\tau_1$ (ns) | Rel (%) | $\tau_2$ (ns) | Rel (%) | $\tau$ (ns) | $\chi^2$ |
|------------------------------|---------------|---------|---------------|---------|-------------|----------|
| 0                            | 5.1           | 2       | 15.4          | 98      | 15.3        | 1.14     |
| 1                            | 4.7           | 23      | 15.2          | 77      | 14.3        | 1.17     |
| 4                            | 4.4           | 32      | 14.9          | 68      | 13.6        | 1.16     |
| 20                           | 4.6           | 63      | 14.3          | 37      | 10.9        | 1.29     |
| 100                          | 4.4           | 75      | 13.4          | 25      | 9.0         | 1.23     |

**Table S7** Time-resolved fluorescence-delay analysis of GOQDs with different [Hg<sup>2+</sup>]

| [Hg <sup>2+</sup> ]/ $\mu$ M | $\tau_1$ (ns) | Rel (%) | $\tau_2$ (ns) | Rel (%) | $\tau$ (ns) | $\chi^2$ |
|------------------------------|---------------|---------|---------------|---------|-------------|----------|
| 0                            | 4.6           | 18      | 12.4          | 82      | 11.8        | 1.24     |
| 1                            | 4.8           | 21      | 12.1          | 79      | 11.4        | 1.22     |
| 4                            | 4.9           | 25      | 11.9          | 75      | 11.1        | 1.24     |
| 20                           | 4.6           | 37      | 10.9          | 63      | 9.6         | 1.24     |
| 100                          | 4.2           | 36      | 9.8           | 64      | 8.7         | 1.21     |

**Table S8** Potentials of the elements at 25 °C

| Half-reaction                                                | Standard potential | Half-reaction                                        | Standard potential |
|--------------------------------------------------------------|--------------------|------------------------------------------------------|--------------------|
| $\text{Fe}^{3+} + \text{e}^- \rightarrow \text{Fe}^{2+}$     | 0.771              | $\text{Ca}^{2+} + 2\text{e}^- \rightarrow \text{Ca}$ | -2.868             |
| $\text{Fe}^{3+} + 3\text{e}^- \rightarrow \text{Fe}$         | -0.037             | $\text{Cu}^{2+} + 2\text{e}^- \rightarrow \text{Cu}$ | 0.3419             |
| $\text{Fe}^{2+} + \text{e}^- \rightarrow \text{Fe}$          | -0.477             | $\text{Mn}^{2+} + 2\text{e}^- \rightarrow \text{Mn}$ | -1.185             |
| $2\text{Hg}^{2+} + 2\text{e}^- \rightarrow \text{Hg}_2^{2+}$ | 0.920              | $\text{Pb}^{2+} + 2\text{e}^- \rightarrow \text{Pb}$ | -1.262             |
| $\text{Hg}^{2+} + 2\text{e}^- \rightarrow \text{Hg}$         | 0.851              | $\text{Cd}^{2+} + 2\text{e}^- \rightarrow \text{Cd}$ | -0.403             |
| $\text{Hg}_2^{2+} + 2\text{e}^- \rightarrow 2\text{Hg}$      | 0.7973             | $\text{La}^{3+} + 3\text{e}^- \rightarrow \text{La}$ | -2.522             |
